# Supplementary material
Source: publisher figshare collection journal article supplement (https://frontiersin.figshare.com/ndownloader/files/17704874)
Supplement: Supplementary file 1 [file 17704874]

Supplemental Materials:

Table 1. Numerical Nutrient Data in Fig. 6

| Alongshore Meters | NO2,3- | PO43- | SiO2 | Salinity | Tidal Stage |
| --- | --- | --- | --- | --- | --- |
| -25.0 | 25.3 | 3.4 | 5.4 | 13.6 | High Tide |
| 75.0 | 2.8 | 2.4 | 6.2 | 14.4 | High Tide |
| 135.0 | 14.5 | 4.0 | 4.0 | 15.1 | High Tide |
| 200.0 | 23.0 | 4.7 | 6.2 | 22.2 | High Tide |
| 275.0 | 7.9 | 1.1 | 8.6 | 22.0 | High Tide |
| 370.0 | 38.5 | 2.2 | 4.7 | - | High Tide |
| 440.0 | 42.3 | 12.4 | 17.2 | - | High Tide |
| 580.0 | 8.7 | 4.3 | 4.5 | 20.0 | High Tide |
| 710.0 | 9.4 | 13.0 | 6.6 | 16.2 | High Tide |
| 210.0 | 0.2 | 0.1 | 2.3 | 34.8 | Low Tide |
| 230.0 | 0.3 | 0.1 | 2.5 | 34.5 | Low Tide |
